# Supplementary material for: Bacterial adaptation is constrained in complex communities
Source: PubMed Central journal article supplement (PMC7005322; doi:10.1038/s41467-020-14570-z), 2020-02-06
Supplement: 41467_2020_14570_MOESM3_ESM.pdf [file 41467_2020_14570_MOESM3_ESM.pdf]

## Reporting Summary

Nature Research wishes to improve the reproducibility of the work that we publish. This form provides structure for consistency and transparency in reporting. For further information on Nature Research policies, see [Authors & Referees](#) and the [Editorial Policy Checklist](#).

### Statistics

For all statistical analyses, confirm that the following items are present in the figure legend, table legend, main text, or Methods section.

n/a Confirmed

- The exact sample size ( $n$ ) for each experimental group/condition, given as a discrete number and unit of measurement
- A statement on whether measurements were taken from distinct samples or whether the same sample was measured repeatedly
- The statistical test(s) used AND whether they are one- or two-sided  
*Only common tests should be described solely by name; describe more complex techniques in the Methods section.*
- A description of all covariates tested
- A description of any assumptions or corrections, such as tests of normality and adjustment for multiple comparisons
- A full description of the statistical parameters including central tendency (e.g. means) or other basic estimates (e.g. regression coefficient) AND variation (e.g. standard deviation) or associated estimates of uncertainty (e.g. confidence intervals)
- For null hypothesis testing, the test statistic (e.g.  $F$ ,  $t$ ,  $r$ ) with confidence intervals, effect sizes, degrees of freedom and  $P$  value noted  
*Give  $P$  values as exact values whenever suitable.*
- For Bayesian analysis, information on the choice of priors and Markov chain Monte Carlo settings
- For hierarchical and complex designs, identification of the appropriate level for tests and full reporting of outcomes
- Estimates of effect sizes (e.g. Cohen's  $d$ , Pearson's  $r$ ), indicating how they were calculated

*Our web collection on [statistics for biologists](#) contains articles on many of the points above.*

### Software and code

Policy information about [availability of computer code](#)

Data collection

Data analysis

For manuscripts utilizing custom algorithms or software that are central to the research but not yet described in published literature, software must be made available to editors/reviewers. We strongly encourage code deposition in a community repository (e.g. GitHub). See the Nature Research [guidelines for submitting code & software](#) for further information.

### Data

Policy information about [availability of data](#)

All manuscripts must include a [data availability statement](#). This statement should provide the following information, where applicable:

- Accession codes, unique identifiers, or web links for publicly available datasets
- A list of figures that have associated raw data
- A description of any restrictions on data availability

### Field-specific reporting

Please select the one below that is the best fit for your research. If you are not sure, read the appropriate sections before making your selection.

- Life sciences       Behavioural & social sciences       Ecological, evolutionary & environmental sciences

For a reference copy of the document with all sections, see [nature.com/documents/nr-reporting-summary-flat.pdf](https://nature.com/documents/nr-reporting-summary-flat.pdf)

## Life sciences study design

All studies must disclose on these points even when the disclosure is negative.

|                 |                                                                                                                                                                                              |
|-----------------|----------------------------------------------------------------------------------------------------------------------------------------------------------------------------------------------|
| Sample size     | We used 864 microcosms containing the 9 background communities and one of the 22 focal strains. We applied 4 replicates per focal strain community pair including a control and a strain mix |
| Data exclusions | No data were excluded for the analysis                                                                                                                                                       |
| Replication     | We used four replicates per focal strain community combination                                                                                                                               |
| Randomization   | We allocated samples randomly to the microcosms                                                                                                                                              |
| Blinding        | Samples were analysed using machines like flow cytometry or optical plate readers                                                                                                            |

## Behavioural & social sciences study design

All studies must disclose on these points even when the disclosure is negative.

|                   |                                                                                                                                                                                                                                                                                                                                                                                                                                                                                        |
|-------------------|----------------------------------------------------------------------------------------------------------------------------------------------------------------------------------------------------------------------------------------------------------------------------------------------------------------------------------------------------------------------------------------------------------------------------------------------------------------------------------------|
| Study description | <i>Briefly describe the study type including whether data are quantitative, qualitative, or mixed-methods (e.g. qualitative cross-sectional, quantitative experimental, mixed-methods case study).</i>                                                                                                                                                                                                                                                                                 |
| Research sample   | <i>State the research sample (e.g. Harvard university undergraduates, villagers in rural India) and provide relevant demographic information (e.g. age, sex) and indicate whether the sample is representative. Provide a rationale for the study sample chosen. For studies involving existing datasets, please describe the dataset and source.</i>                                                                                                                                  |
| Sampling strategy | <i>Describe the sampling procedure (e.g. random, snowball, stratified, convenience). Describe the statistical methods that were used to predetermine sample size OR if no sample-size calculation was performed, describe how sample sizes were chosen and provide a rationale for why these sample sizes are sufficient. For qualitative data, please indicate whether data saturation was considered, and what criteria were used to decide that no further sampling was needed.</i> |
| Data collection   | <i>Provide details about the data collection procedure, including the instruments or devices used to record the data (e.g. pen and paper, computer, eye tracker, video or audio equipment) whether anyone was present besides the participant(s) and the researcher, and whether the researcher was blind to experimental condition and/or the study hypothesis during data collection.</i>                                                                                            |
| Timing            | <i>Indicate the start and stop dates of data collection. If there is a gap between collection periods, state the dates for each sample cohort.</i>                                                                                                                                                                                                                                                                                                                                     |
| Data exclusions   | <i>If no data were excluded from the analyses, state so OR if data were excluded, provide the exact number of exclusions and the rationale behind them, indicating whether exclusion criteria were pre-established.</i>                                                                                                                                                                                                                                                                |
| Non-participation | <i>State how many participants dropped out/declined participation and the reason(s) given OR provide response rate OR state that no participants dropped out/declined participation.</i>                                                                                                                                                                                                                                                                                               |
| Randomization     | <i>If participants were not allocated into experimental groups, state so OR describe how participants were allocated to groups, and if allocation was not random, describe how covariates were controlled.</i>                                                                                                                                                                                                                                                                         |

## Ecological, evolutionary & environmental sciences study design

All studies must disclose on these points even when the disclosure is negative.

|                          |                                                                                                                                                                                                                                                                                                                                                                        |
|--------------------------|------------------------------------------------------------------------------------------------------------------------------------------------------------------------------------------------------------------------------------------------------------------------------------------------------------------------------------------------------------------------|
| Study description        | We used 22 non pathogenic focal bacterial strains isolated from 11 beech tree communities. We then followed adaptive evolution of these focal strains while evolving for 6 month in the communities. At the end we compared the evolved strain and the ancestral strain while competing for resources in the coevolved background community for a period of two weeks. |
| Research sample          | We used 864 microcosms containing the background community and one of the focal strains. We applied 4 replicates per focal strain community pair including a control and a strain mix.                                                                                                                                                                                 |
| Sampling strategy        | For the evolved vs. ancestor comparison we sampled the initial time point, after 7 days and after 14 days.                                                                                                                                                                                                                                                             |
| Data collection          | Data were collected using flow cytometry, optical density reading, genome sequencing and illumina sequencing.                                                                                                                                                                                                                                                          |
| Timing and spatial scale | The selection experiment ran for 6 month. The comparison between evolved and ancestral strain for two weeks.                                                                                                                                                                                                                                                           |
| Data exclusions          | After the selection experiment we excluded 3 communities before we did the evolved/ancestor test (relevant for this study) as these indicated contamination.                                                                                                                                                                                                           |

|                                   |                                                                                            |
|-----------------------------------|--------------------------------------------------------------------------------------------|
| Reproducibility                   | <input type="text" value="We included four replicates per focal strain community pair."/>  |
| Randomization                     | <input type="text" value="Focal strains were randomly arranged in the microcosm plate."/>  |
| Blinding                          | <input type="text" value="All samples were analysed using machines like flow cytometry."/> |
| Did the study involve field work? | <input type="checkbox"/> Yes <input checked="" type="checkbox"/> No                        |

## Field work, collection and transport

|                          |                                                                                                                                                                                                                                                                                                                                                             |
|--------------------------|-------------------------------------------------------------------------------------------------------------------------------------------------------------------------------------------------------------------------------------------------------------------------------------------------------------------------------------------------------------|
| Field conditions         | <input type="text" value="Describe the study conditions for field work, providing relevant parameters (e.g. temperature, rainfall)."/>                                                                                                                                                                                                                      |
| Location                 | <input type="text" value="State the location of the sampling or experiment, providing relevant parameters (e.g. latitude and longitude, elevation, water depth)."/>                                                                                                                                                                                         |
| Access and import/export | <input type="text" value="Describe the efforts you have made to access habitats and to collect and import/export your samples in a responsible manner and in compliance with local, national and international laws, noting any permits that were obtained (give the name of the issuing authority, the date of issue, and any identifying information)."/> |
| Disturbance              | <input type="text" value="Describe any disturbance caused by the study and how it was minimized."/>                                                                                                                                                                                                                                                         |

## Reporting for specific materials, systems and methods

We require information from authors about some types of materials, experimental systems and methods used in many studies. Here, indicate whether each material, system or method listed is relevant to your study. If you are not sure if a list item applies to your research, read the appropriate section before selecting a response.

### Materials & experimental systems

| n/a                      | Involved in the study                                |
|--------------------------|------------------------------------------------------|
| <input type="checkbox"/> | <input type="checkbox"/> Antibodies                  |
| <input type="checkbox"/> | <input type="checkbox"/> Eukaryotic cell lines       |
| <input type="checkbox"/> | <input type="checkbox"/> Palaeontology               |
| <input type="checkbox"/> | <input type="checkbox"/> Animals and other organisms |
| <input type="checkbox"/> | <input type="checkbox"/> Human research participants |
| <input type="checkbox"/> | <input type="checkbox"/> Clinical data               |

### Methods

| n/a                      | Involved in the study                              |
|--------------------------|----------------------------------------------------|
| <input type="checkbox"/> | <input type="checkbox"/> ChIP-seq                  |
| <input type="checkbox"/> | <input checked="" type="checkbox"/> Flow cytometry |
| <input type="checkbox"/> | <input type="checkbox"/> MRI-based neuroimaging    |

## Antibodies

|                 |                                                      |
|-----------------|------------------------------------------------------|
| Antibodies used | <input type="text" value="no antibodies were used"/> |
| Validation      | <input type="text" value="not relevant"/>            |

## Eukaryotic cell lines

Policy information about [cell lines](#)

|                                                                      |                                           |
|----------------------------------------------------------------------|-------------------------------------------|
| Cell line source(s)                                                  | <input type="text" value="not relevant"/> |
| Authentication                                                       | <input type="text" value="not relevant"/> |
| Mycoplasma contamination                                             | <input type="text" value="not relevant"/> |
| Commonly misidentified lines<br>(See <a href="#">ICLAC</a> register) | <input type="text" value="not relevant"/> |

## Palaeontology

|                          |                                                                                                                        |
|--------------------------|------------------------------------------------------------------------------------------------------------------------|
| Specimen provenance      | <input type="text" value="not relevant"/>                                                                              |
| Specimen deposition      | <input type="text" value="not relevant"/>                                                                              |
| Dating methods           | <input type="text" value="not relevant"/>                                                                              |
| <input type="checkbox"/> | Tick this box to confirm that the raw and calibrated dates are available in the paper or in Supplementary Information. |

## Animals and other organisms

Policy information about [studies involving animals](#); [ARRIVE guidelines](#) recommended for reporting animal research

|                         |                                                                     |
|-------------------------|---------------------------------------------------------------------|
| Laboratory animals      | not relevant                                                        |
| Wild animals            | not relevant                                                        |
| Field-collected samples | Bacterial communities were sampled from natural sites located in UK |
| Ethics oversight        | not relevant                                                        |

Note that full information on the approval of the study protocol must also be provided in the manuscript.

## Human research participants

Policy information about [studies involving human research participants](#)

|                            |              |
|----------------------------|--------------|
| Population characteristics | not relevant |
| Recruitment                | not relevant |
| Ethics oversight           | not relevant |

Note that full information on the approval of the study protocol must also be provided in the manuscript.

## Clinical data

Policy information about [clinical studies](#)

All manuscripts should comply with the ICMJE [guidelines for publication of clinical research](#) and a completed [CONSORT checklist](#) must be included with all submissions.

|                             |              |
|-----------------------------|--------------|
| Clinical trial registration | not relevant |
| Study protocol              | not relevant |
| Data collection             | not relevant |
| Outcomes                    | not relevant |

## ChIP-seq

### Data deposition

- Confirm that both raw and final processed data have been deposited in a public database such as [GEO](#).
- Confirm that you have deposited or provided access to graph files (e.g. BED files) for the called peaks.

|                                                                    |              |
|--------------------------------------------------------------------|--------------|
| Data access links<br><i>May remain private before publication.</i> | not relevant |
| Files in database submission                                       | not relevant |
| Genome browser session<br>(e.g. <a href="#">UCSC</a> )             | not relevant |

### Methodology

|                         |              |
|-------------------------|--------------|
| Replicates              | not relevant |
| Sequencing depth        | not relevant |
| Antibodies              | not relevant |
| Peak calling parameters | not relevant |
| Data quality            | not relevant |
| Software                | not relevant |

## Flow Cytometry

### Plots

Confirm that:

- The axis labels state the marker and fluorochrome used (e.g. CD4-FITC).
- The axis scales are clearly visible. Include numbers along axes only for bottom left plot of group (a 'group' is an analysis of identical markers).
- All plots are contour plots with outliers or pseudocolor plots.
- A numerical value for number of cells or percentage (with statistics) is provided.

### Methodology

- Sample preparation
- Instrument
- Software
- Cell population abundance
- Gating strategy
- Tick this box to confirm that a figure exemplifying the gating strategy is provided in the Supplementary Information.

## Magnetic resonance imaging

### Experimental design

- Design type
- Design specifications
- Behavioral performance measures

### Acquisition

- Imaging type(s)
- Field strength
- Sequence & imaging parameters
- Area of acquisition
- Diffusion MRI  Used  Not used

### Preprocessing

- Preprocessing software
- Normalization
- Normalization template
- Noise and artifact removal
- Volume censoring

### Statistical modeling & inference

- Model type and settings
- Effect(s) tested
- Specify type of analysis:  Whole brain  ROI-based  Both

Statistic type for inference  
(See [Eklund et al. 2016](#))

not relevant

Correction

not relevant

## Models & analysis

n/a | Involved in the study

Functional and/or effective connectivity

Graph analysis

Multivariate modeling or predictive analysis

Functional and/or effective connectivity

not relevant

Graph analysis

not relevant

Multivariate modeling and predictive analysis

not relevant
